# Supplementary material for: Relationship between latent and rebound viruses in a clinical trial of anti–HIV-1 antibody 3BNC117
Source: PubMed Central journal article supplement — J Exp Med. 2018 Sep 3;215(9):2311–24. doi: 10.1084/jem.20180936 (PMC6122972; doi:10.1084/jem.20180936), 2018-09-03

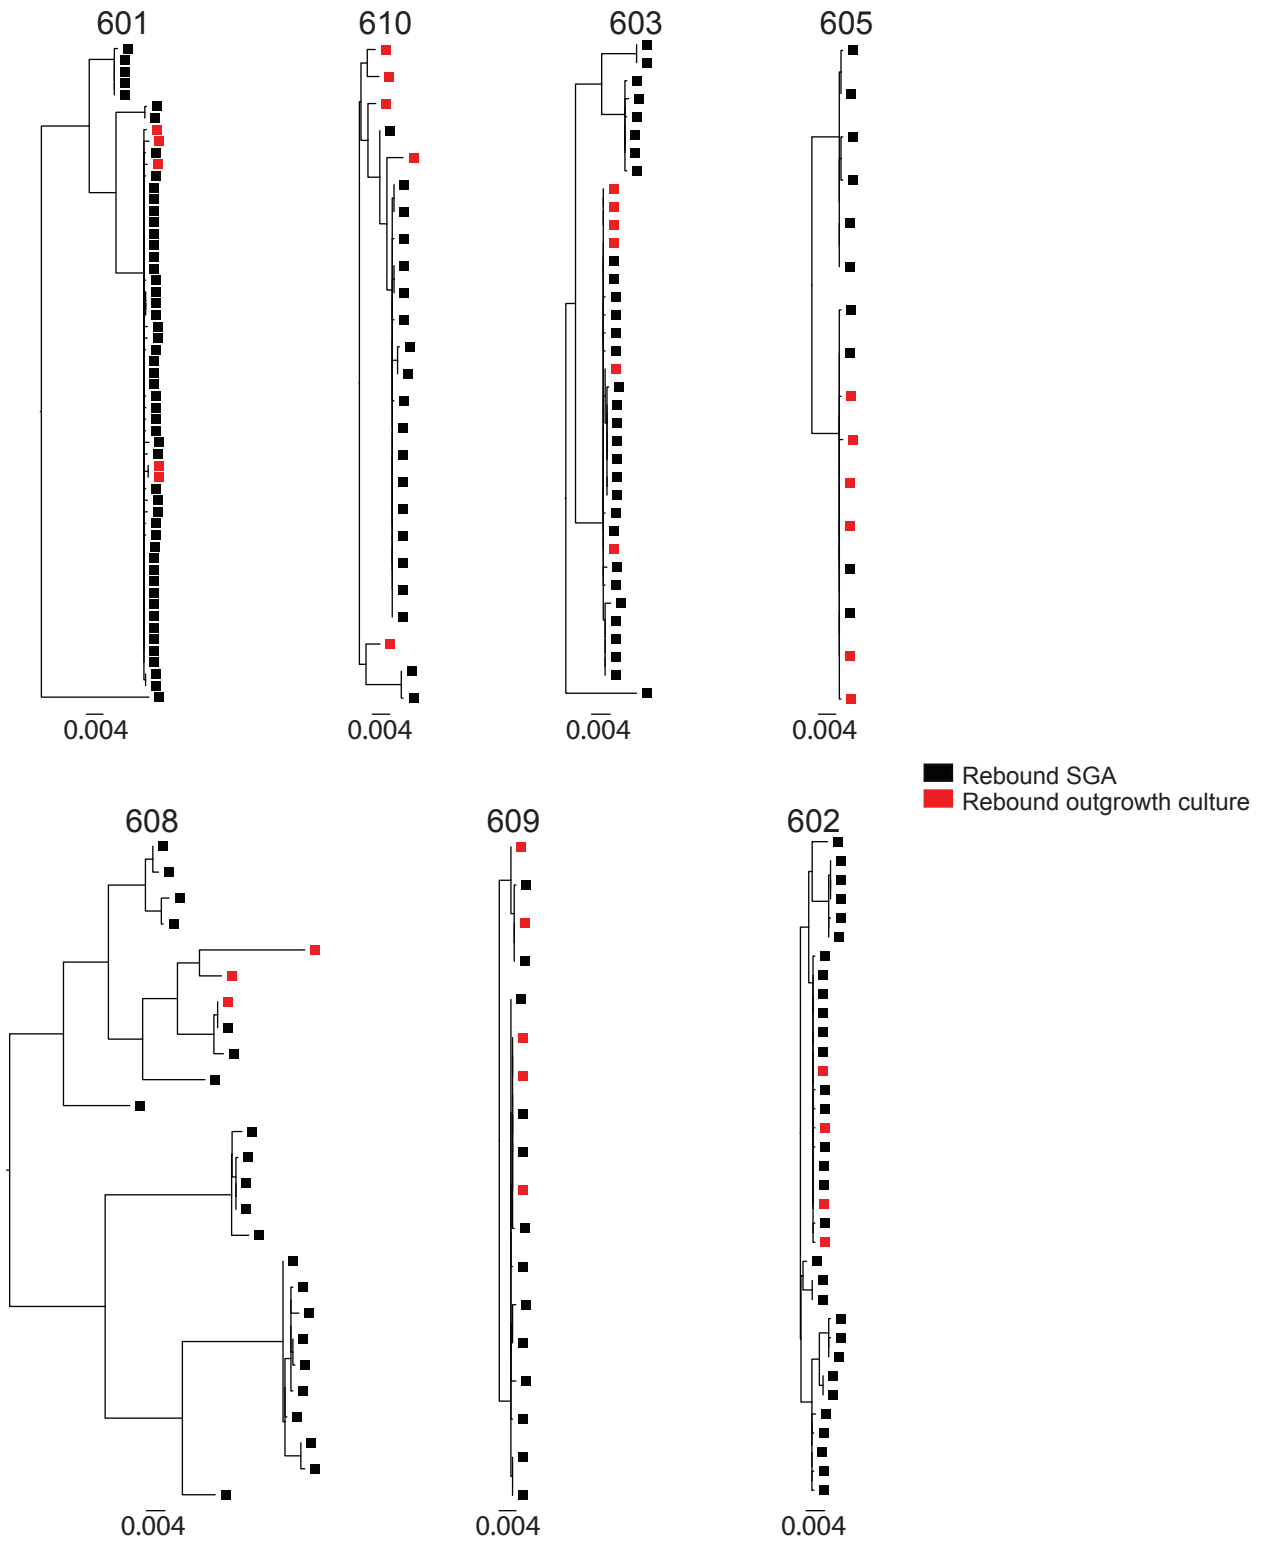

Supplementary Dataset 1. Env sequences from rebound outgrowth cultures and rebound SGA.

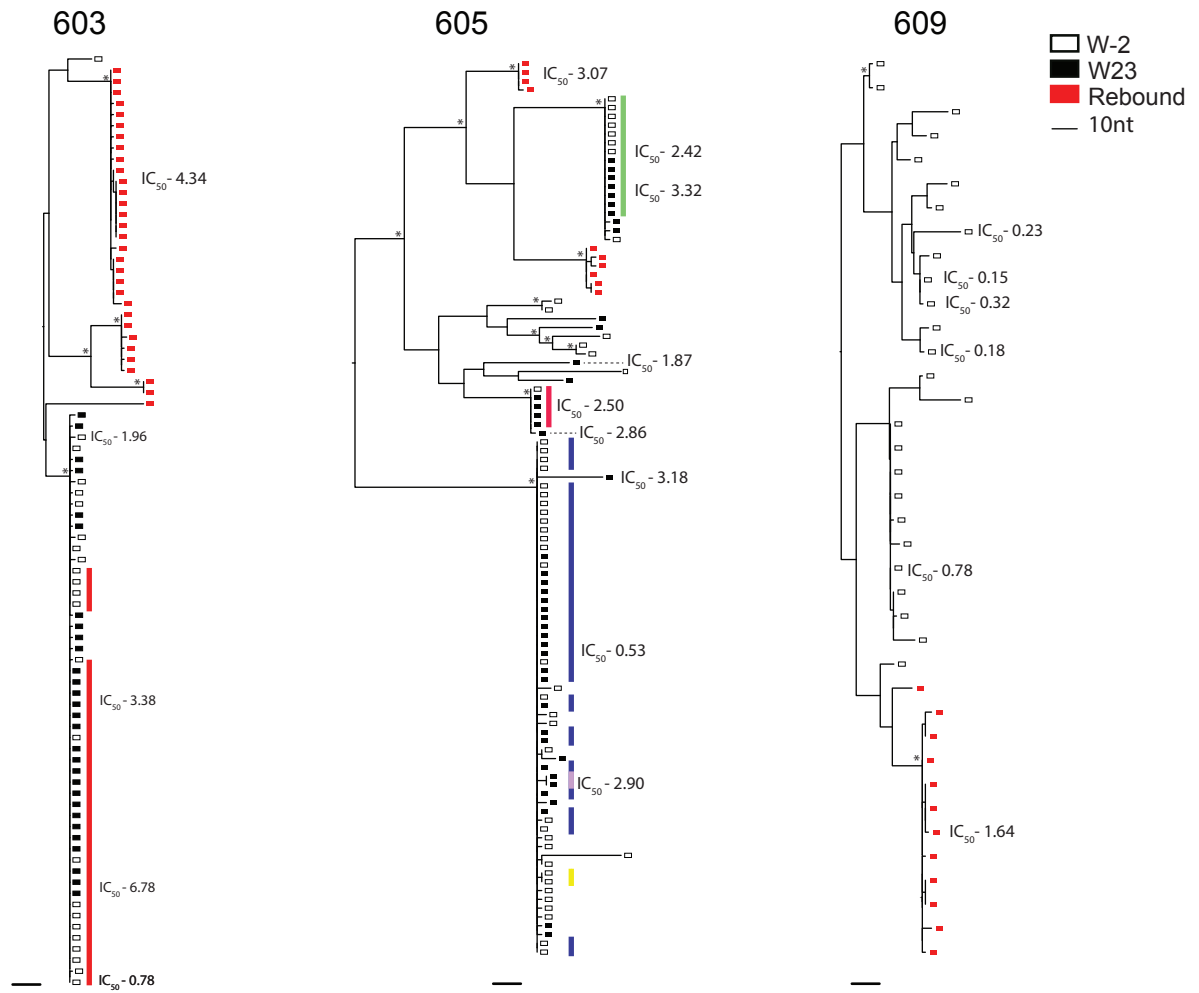

Supplementary Dataset 2. Env sequences from Q2VOA cultures and rebound SGA.

Supplementary Dataset 2 continued.

608

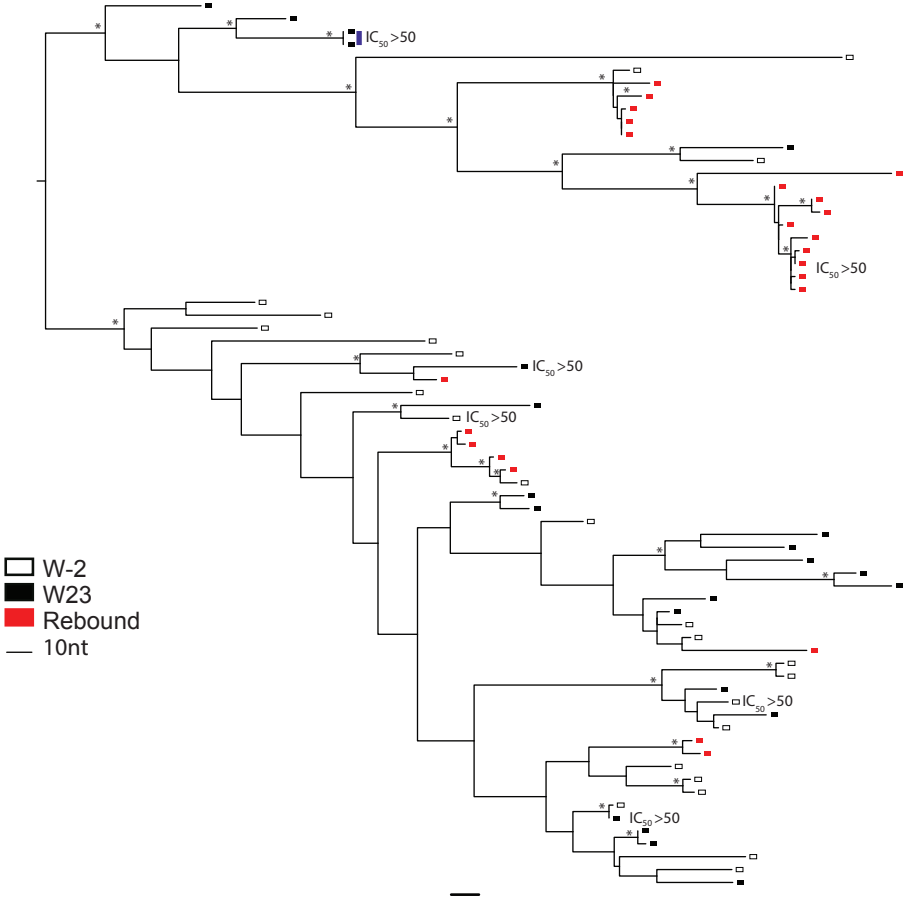

Supplementary Dataset 2 continued.

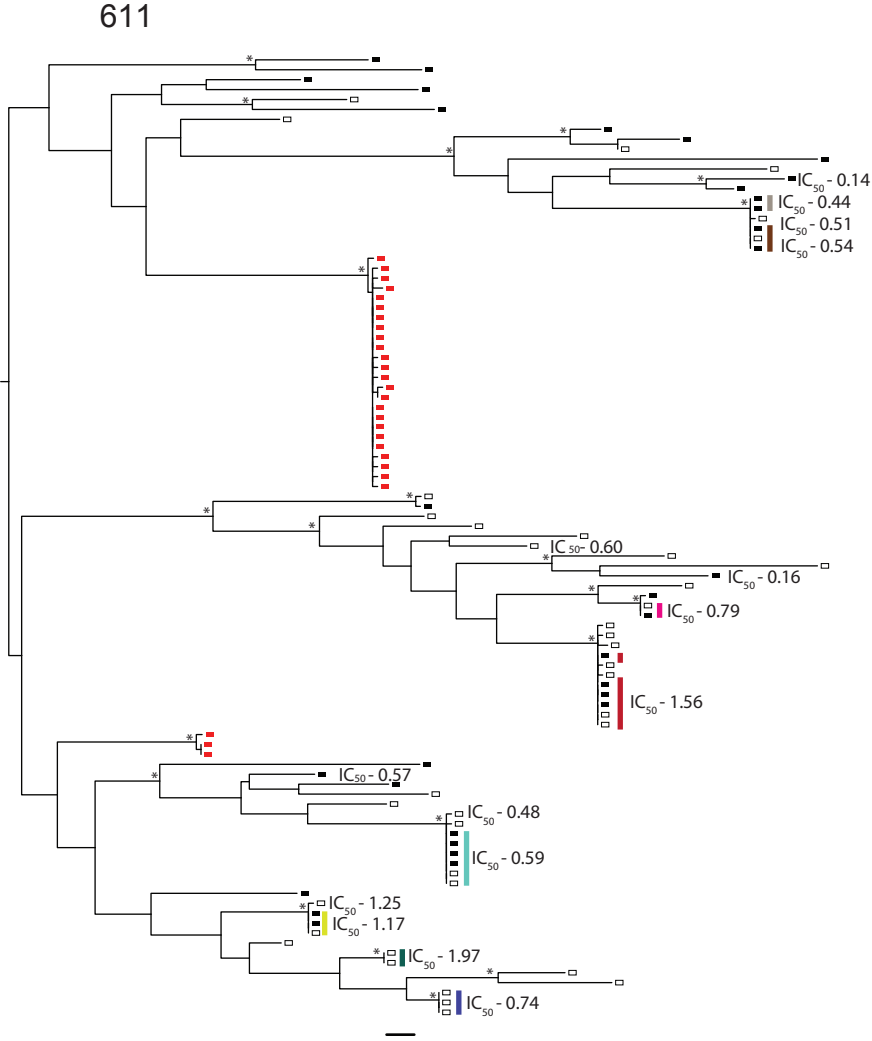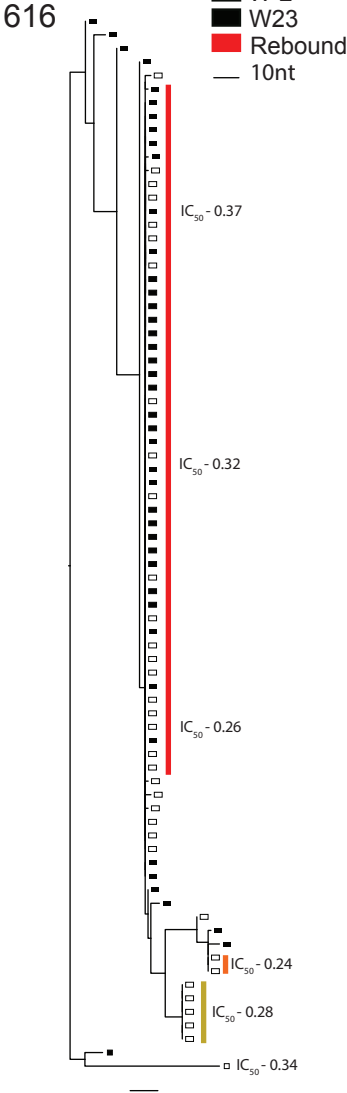

□ W-2  
 ■ W23  
 ■ Rebound  
 — 10nt

A 601

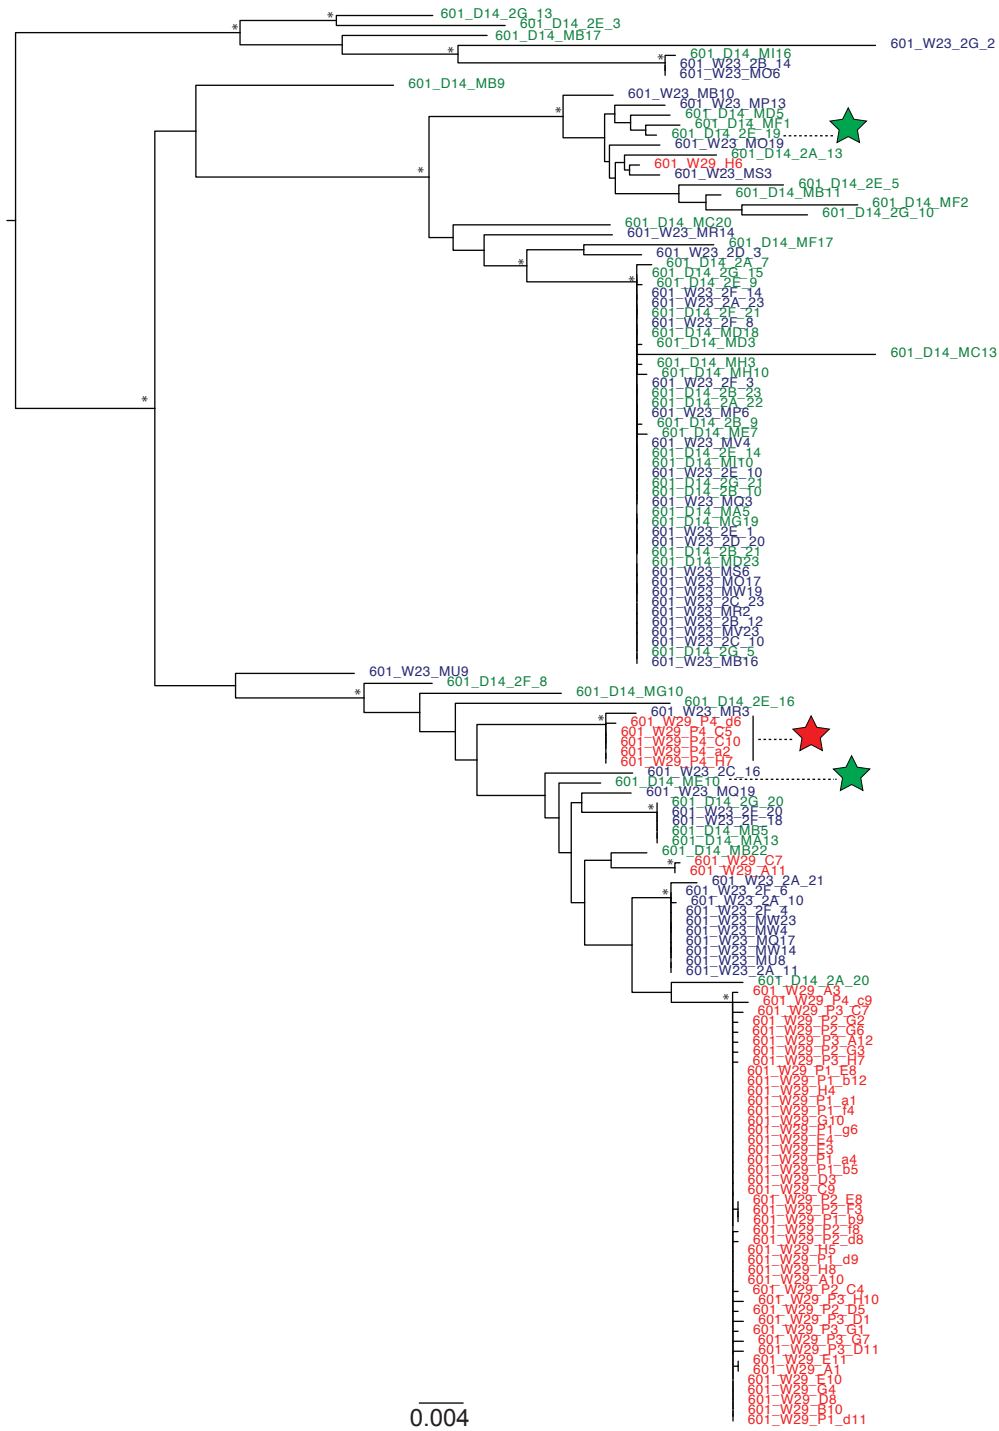

Supplementary Dataset 3. Maximum likelihood phylogenetic trees of full-length env sequences from Q2VOA cultures, rebound SGA, and near full-length genome (NFL).

Supplementary Dataset 3 continued.

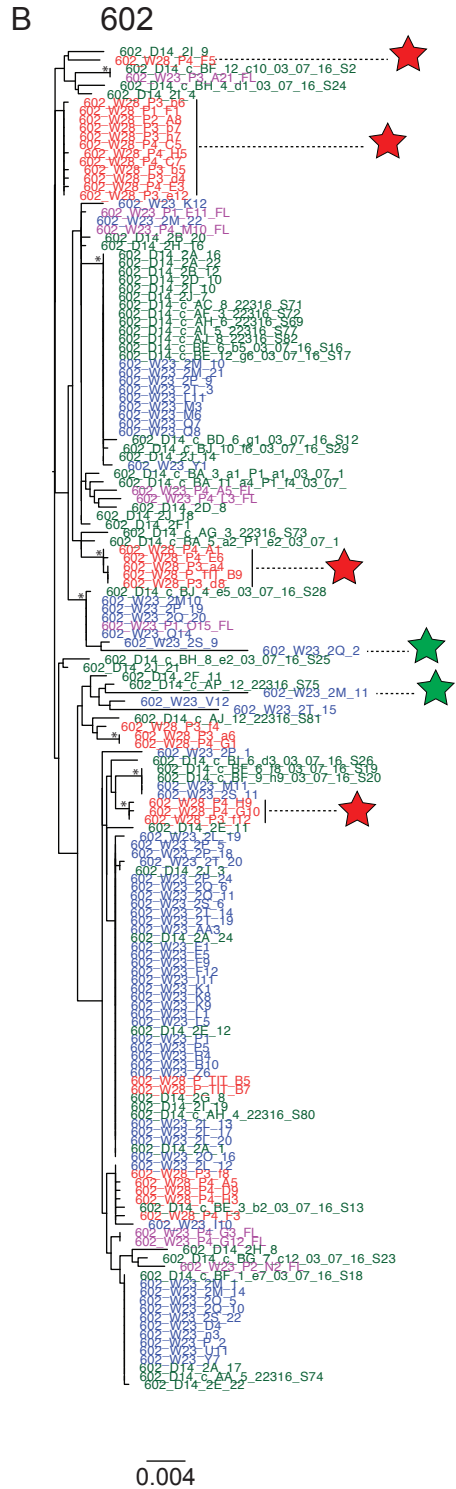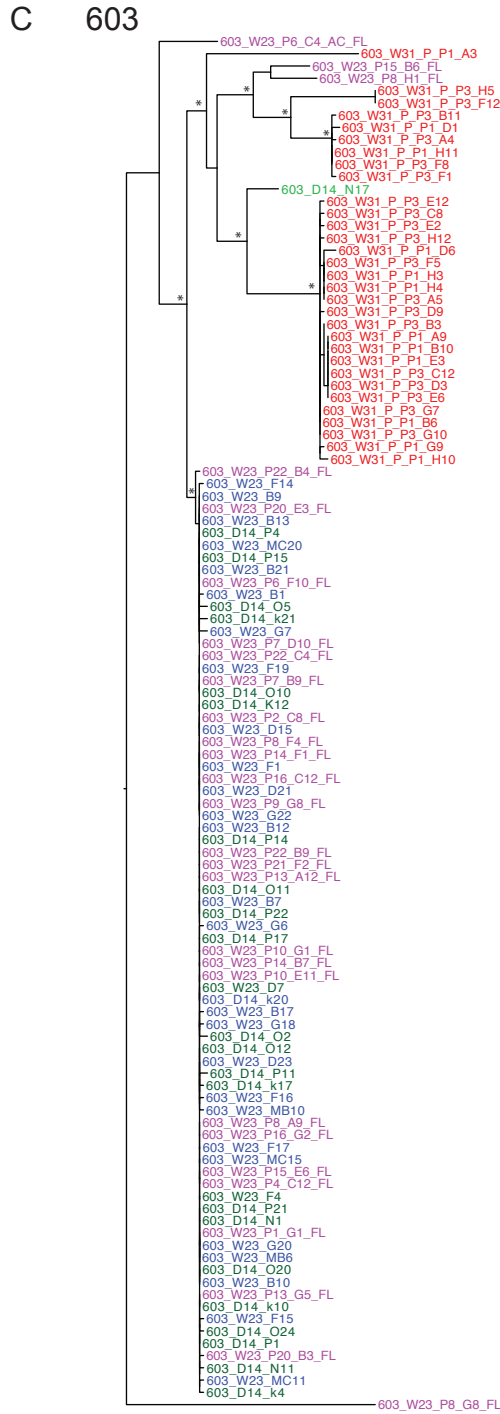

Supplementary Dataset 3 continued.

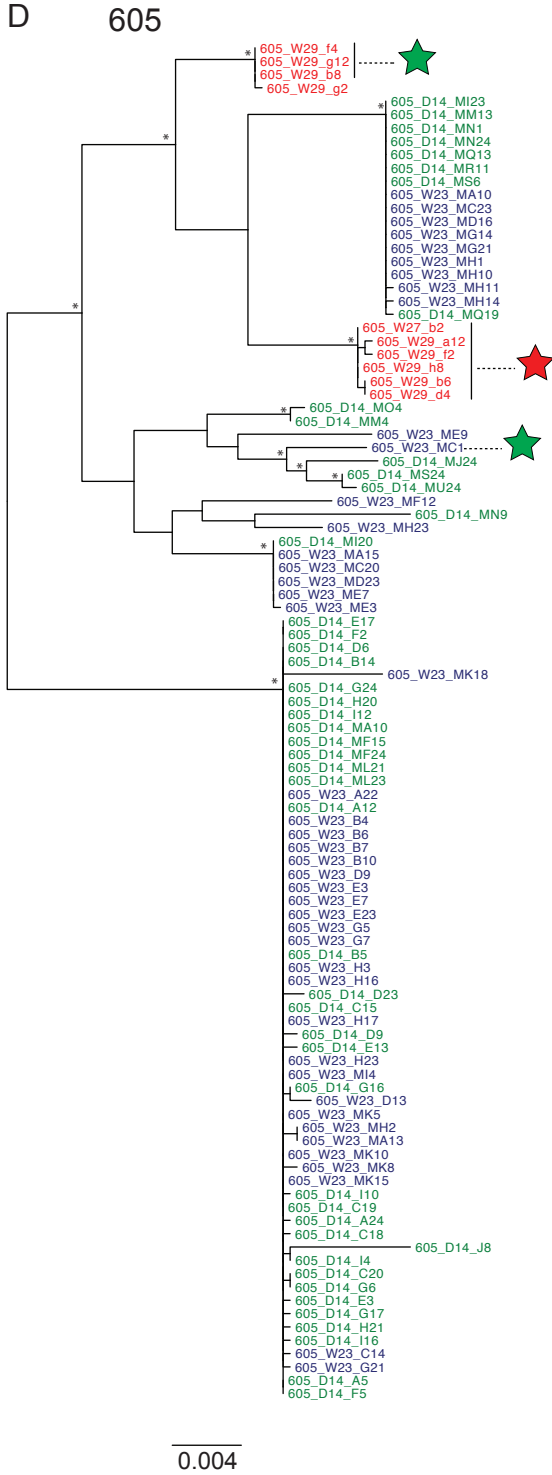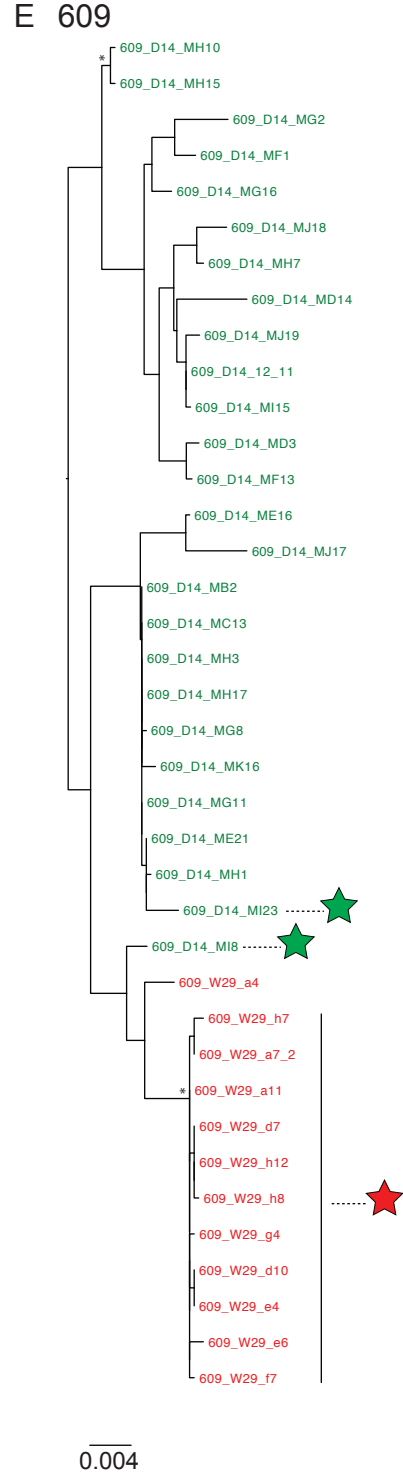

Supplementary Dataset 3 continued.

F 608

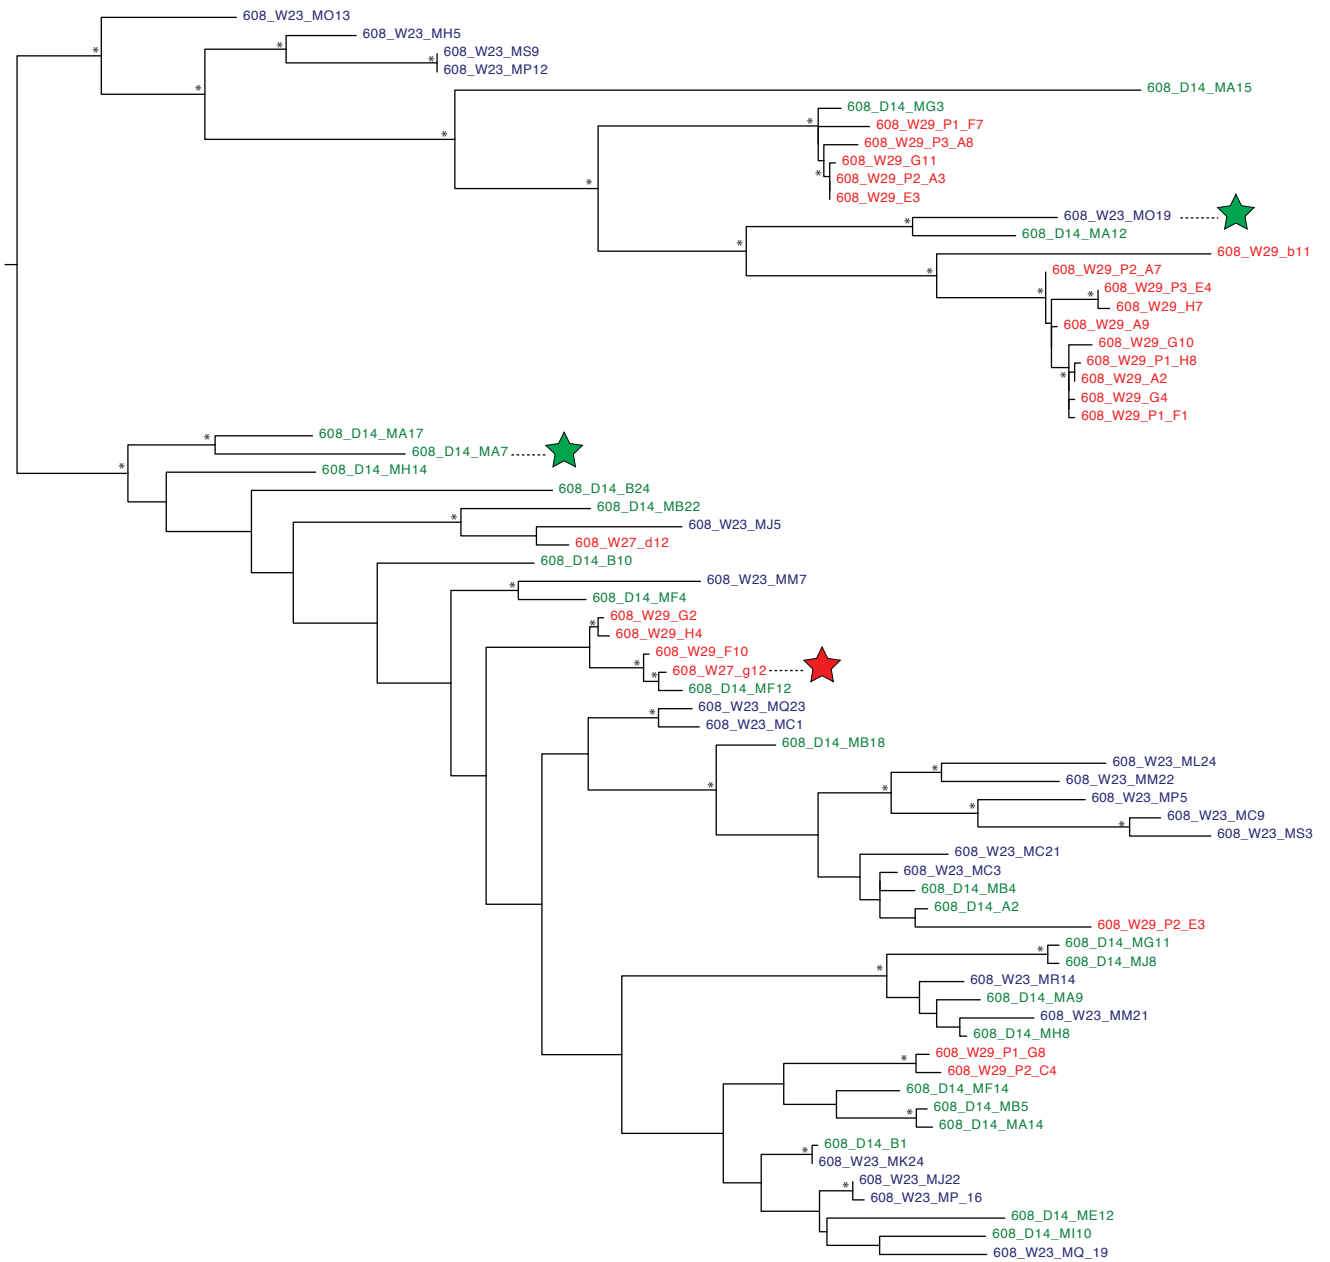

0.004



Supplementary Dataset 3 continued.

G

611

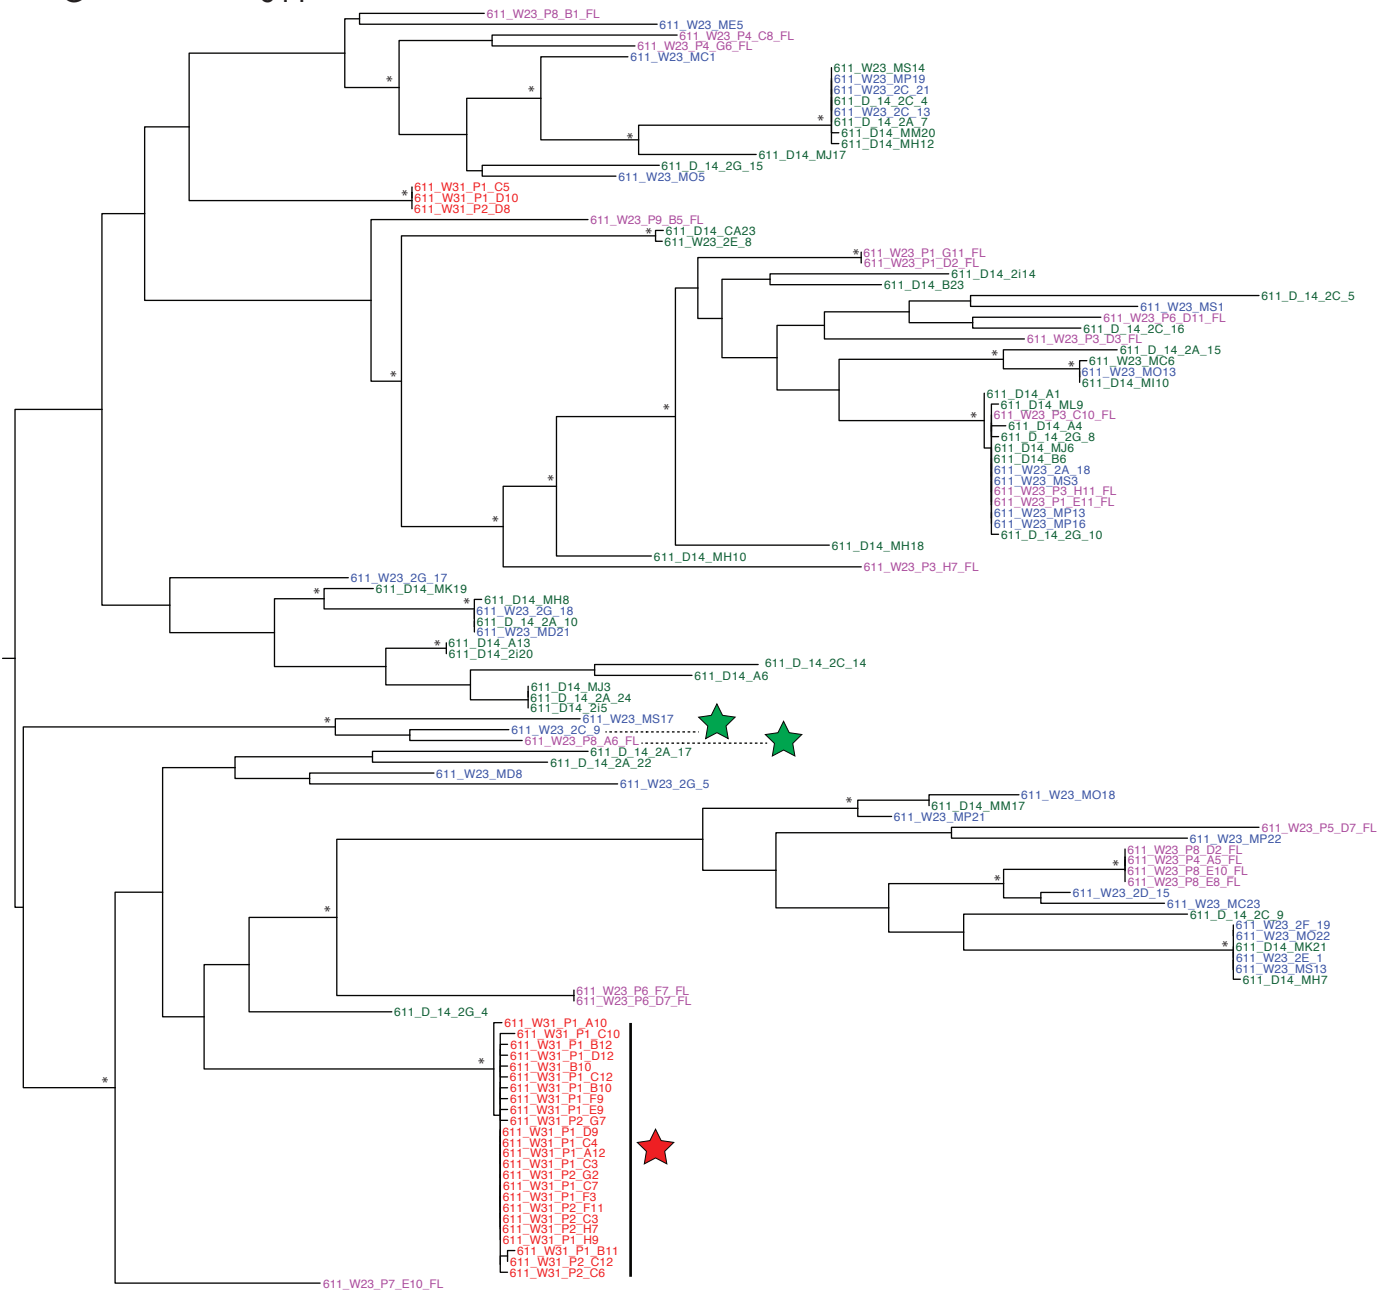

0.004

Supplementary Dataset 3 continued.

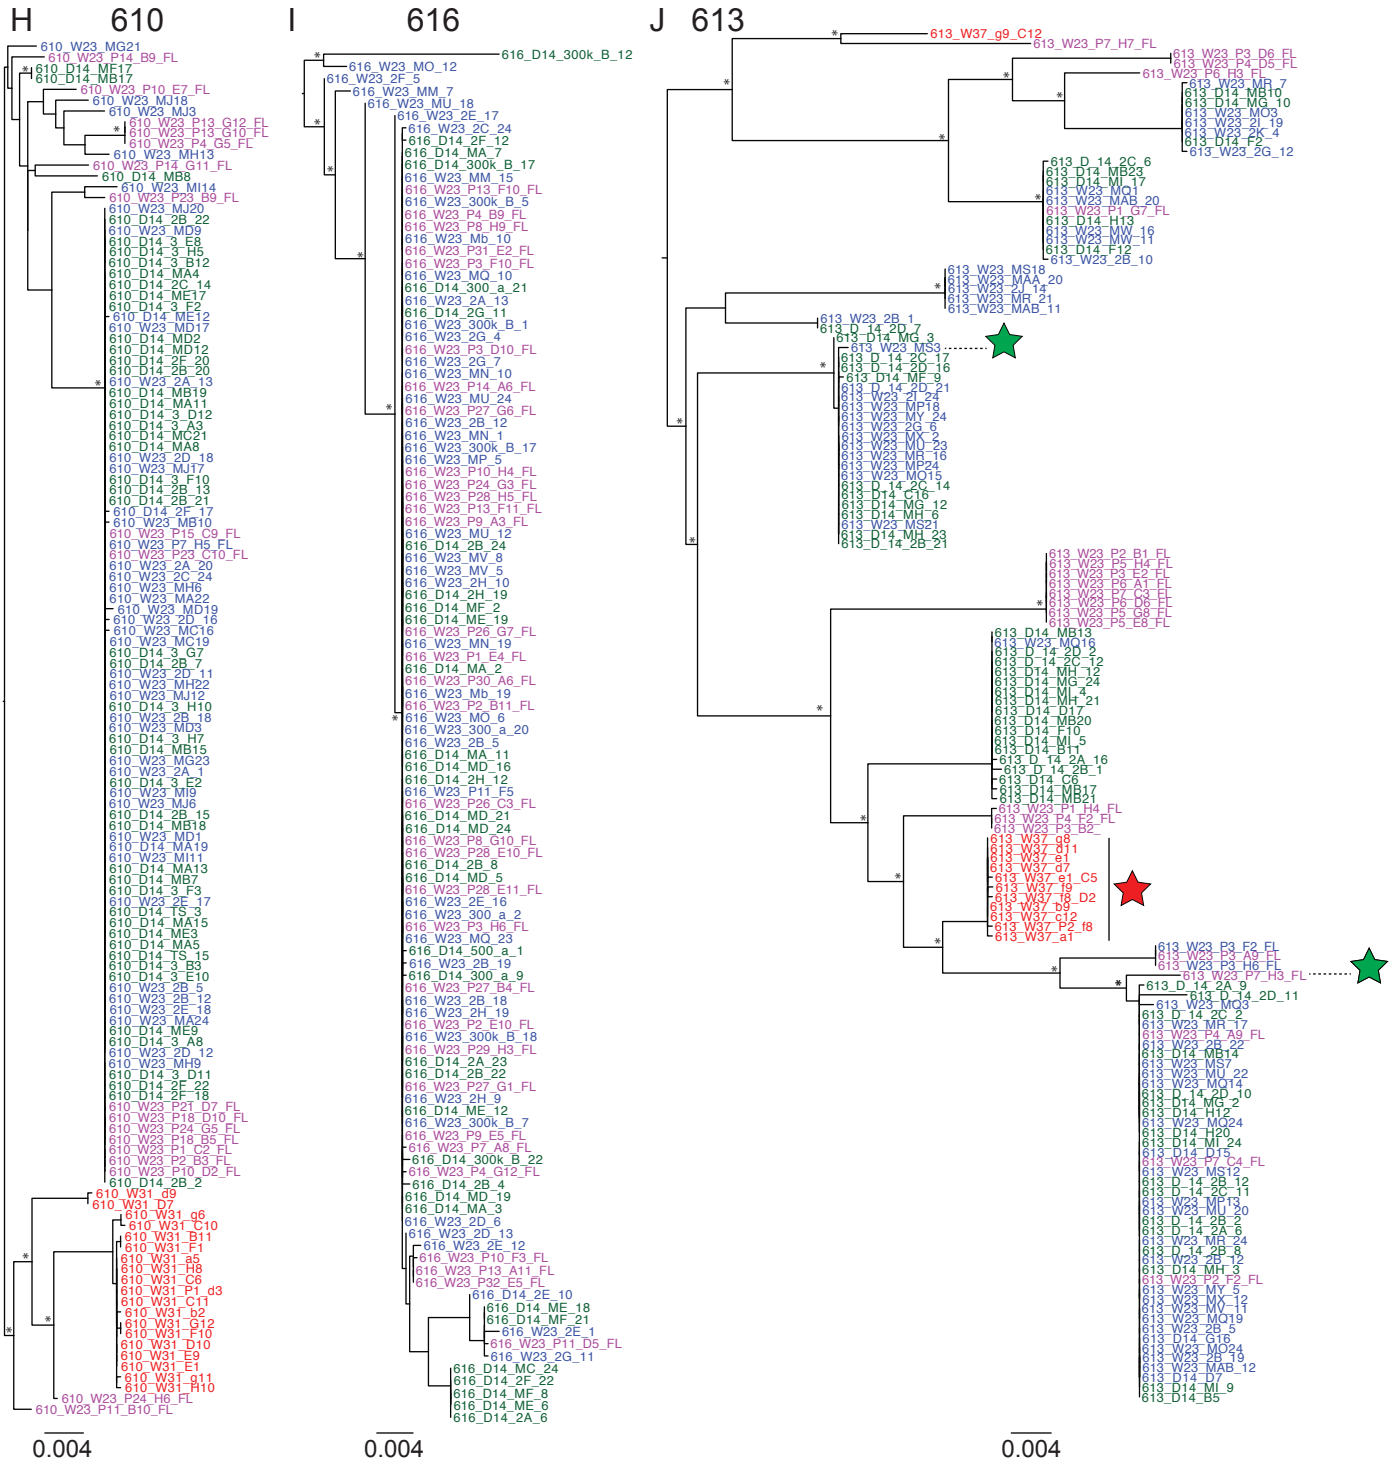

Supplement: JEM_20180936_DataS1.pdf [file JEM_20180936_DataS1.pdf]
